# Supplementary material for: Behavioral Health Integration in Community Health Centers and Emergency Department Use
Source: Atypon-hosted journal article supplement (doi:10.1176/appi.ps.202100626), 2022-05-17
Supplement: appi.ps.202100626.ds001.pdf [file appi.ps.202100626.ds001.pdf]

Online supplement for 10.1176/appi.ps.202100626  
 Table A1. Summary of Exploratory Factor Analysis Results.

|                                                                                                                             | Original MeHAF Domains                                                 |                                          | Redistributed Domains from Factor Analysis    |                                                                |
|-----------------------------------------------------------------------------------------------------------------------------|------------------------------------------------------------------------|------------------------------------------|-----------------------------------------------|----------------------------------------------------------------|
|                                                                                                                             | Domain 1<br><i>Integrated services and Patient/Family Centeredness</i> | Domain 2<br><i>Practice/Organization</i> | Factor1<br>Infrastructure for Team-Based Care | Factor2<br>Activities related to patient and family engagement |
| Q1: Overall level of colocation integration                                                                                 | X                                                                      |                                          | X                                             |                                                                |
| Q2: Shared treatment plan                                                                                                   | X                                                                      |                                          | X                                             |                                                                |
| Q3: Data systems/patient records                                                                                            |                                                                        | X                                        | X                                             |                                                                |
| Q4: Patient care team for implementing integrated care                                                                      |                                                                        | X                                        | X                                             |                                                                |
| Q5: Providers' engagement with integrated care ("buy-in")                                                                   |                                                                        | X                                        | X                                             |                                                                |
| Q6: Continuity of care between primary care and behavioral/mental health                                                    |                                                                        | X                                        | X                                             |                                                                |
| Q7: Physician, team & staff education & training for integrated care                                                        |                                                                        | X                                        | X                                             |                                                                |
| Q8: Funding sources/resources                                                                                               |                                                                        | X                                        | X                                             |                                                                |
| Q9: Screening and assessment for emotional/behavioral health needs/<br>Q10: Screening and assessment for medical care needs | X                                                                      |                                          | X                                             |                                                                |
| Q11: Patient care based on/informed by best practice evidence                                                               | X                                                                      |                                          | X                                             |                                                                |
| Q12: Coordination of referrals and specialists                                                                              |                                                                        | X                                        | X                                             |                                                                |
| Q13: Organization leadership for integrated care                                                                            |                                                                        | X                                        |                                               |                                                                |
| Q14: Patient/family input to integration management                                                                         |                                                                        | X                                        | X                                             | X                                                              |
| Q15: Patient/family involvement in care plan                                                                                | X                                                                      |                                          |                                               | X                                                              |
| Q16: Communication with patients about integrated care                                                                      | X                                                                      |                                          |                                               | X                                                              |
| Q17: Follow-up of assessments, tests, treatment, referrals and other services                                               | X                                                                      |                                          |                                               | X                                                              |
| Q18: Social support (for patients to implement recommended treatment)                                                       | X                                                                      |                                          |                                               | X                                                              |
| Q19: Linking to community resources                                                                                         | X                                                                      |                                          |                                               | X                                                              |

Notes: MeHAF instrument can be found on the HCA website at <https://www.hca.wa.gov/assets/P4R-physical-behavioral-health-integration-practice-site.pdf>

## **Exploratory Factor Analysis Methodology**

In preliminary analyses we conducted an exploratory factor analysis (EFA) using MeHAF survey data from 100 primary care clinics across 3 counties in Washington state. Primary care practice sites included both Federally Qualified Health Centers and hospital-affiliated primary care clinics. A promax oblique factor rotation raised to the third power was used to account for correlation between the factors. We retained factors with eigenvalues of 1 or more, and items with factor loadings 0.6 or higher. The factor loading cut-off was adjusted to account for differences in sample size, number of factors, and number of items. We then excluded items with Kaiser-Meyer-Olkin values lower than 0.80 and communalities of less than 0.4. We did not have Medicaid claims data for beneficiaries outside of King County, WA. So, although we utilize the same domains and items from our EFA, we could only include data from clinics in King County for our analysis examining the association between integrated care and hospital use.

Figure A1. Cohort Derivation

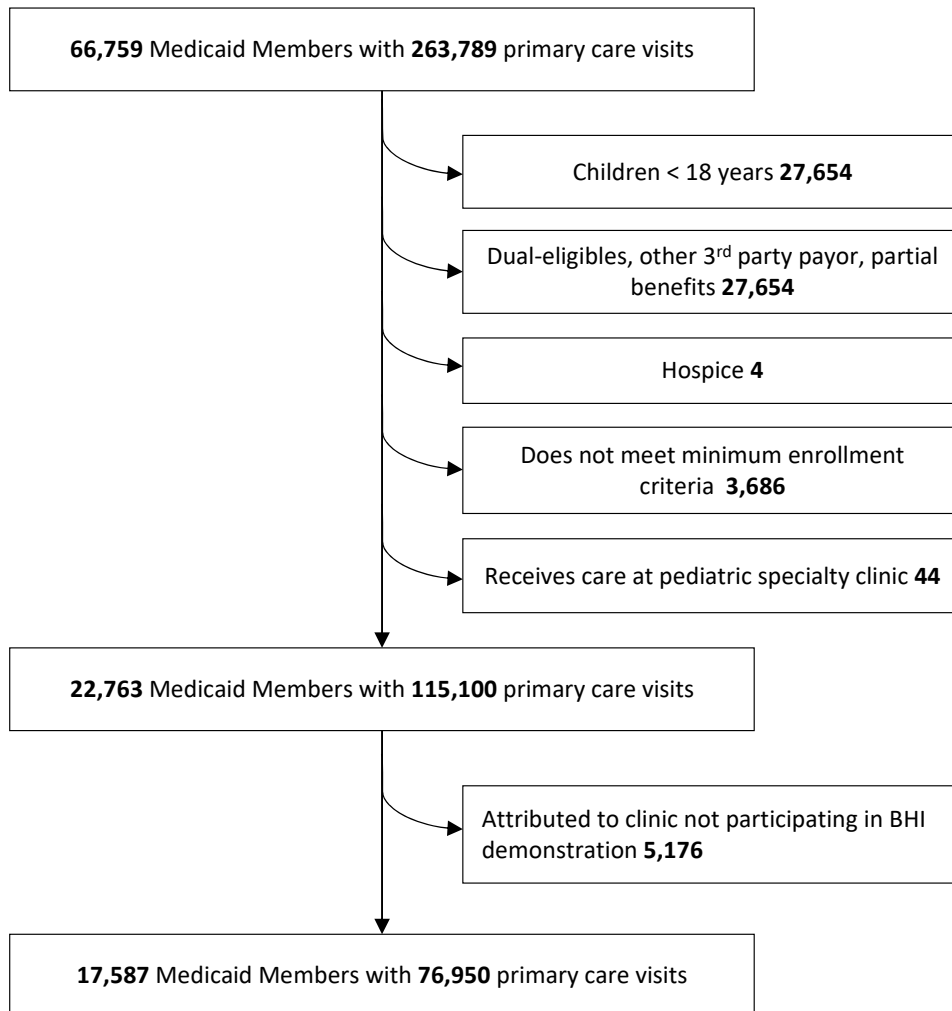

*Notes: Adult (18-64 years) Medicaid enrollees who could be attributed to community health centers participating in the integrated care demonstration were included in the study. We excluded children < 18 years of age; enrollees who were not enrolled for at least 5 of 6 months of the outcomes assessment period and at least 7 of the 12-month risk-adjustment period; enrollees with third party coverage and dual-eligibles; enrollees receiving hospice care; and enrollees attributed to one pediatric specialty clinic. This study was approved by the Washington state Institutional Review Board.*

Figure A2. Study Design showing relationship between time periods used for capturing integrated care services, attributing of enrollees to clinics, risk-adjustment and outcomes assessment.

|                          | 2018-Q1                                                              | 2018-Q2 | 2018-Q3                                                    | 2018-Q4 | 2019-Q1                         | 2019-Q2 |
|--------------------------|----------------------------------------------------------------------|---------|------------------------------------------------------------|---------|---------------------------------|---------|
| <b>Survey (exposure)</b> |                                                                      |         |                                                            |         | <b>MeHAF performance period</b> |         |
| <b>Attribution</b>       |                                                                      |         | <b>Counts primary care visits for provider attribution</b> |         |                                 |         |
| <b>Risk-adjustment</b>   | <b>Measurement of comorbidities and prior acute care utilization</b> |         |                                                            |         |                                 |         |
| <b>Outcomes</b>          |                                                                      |         |                                                            |         | <b>ED visits</b>                |         |

*Notes: Clinics were asked to report on several elements of integrated care that were present for a performance period of January – June 2019. Outcomes were assessed cross-sectionally as the proportion of attributed beneficiaries that had either an ED visit or inpatient admission during the same period. Twelve months of claims data were used to capture comorbidities and baseline health care use for risk-adjustment in the year prior to the performance period. Finally, patients were attributed to clinics where they received a plurality of primary care during the 6-month performance period plus an additional 6-month look-back.*

Table A2. Characteristics of study clinics

|                              | Integrated Team Infrastructure |            |              |             |              | Patient & Family Engagement |             |              |             |              |
|------------------------------|--------------------------------|------------|--------------|-------------|--------------|-----------------------------|-------------|--------------|-------------|--------------|
|                              | Low                            | Average    | <i>p-val</i> | High        | <i>p-val</i> | Low                         | Average     | <i>p-val</i> | High        | <i>p-val</i> |
| Clinics, N                   | 7                              | 8          |              | 7           |              | 8                           | 7           |              | 7           |              |
| Total Attributed Patients, N | 2997                           | 10347      |              | 4243        |              | 9244                        | 3263        |              | 5080        |              |
| Annual Office Visits, N,     | 20414                          | 27929      | 0.11         | 22105       | 0.72         | 25576                       | 20569       | 0.30         | 24639       | 0.85         |
| (6174)                       | (6174)                         | (9990)     |              | (9350)      |              | (7755)                      | (5125)      |              | (12953)     |              |
| Office visits/patient        | 3.5                            | 3.6        |              | 3.7         |              | 3.6                         | 3.2         |              | 4.0         |              |
| Patients served/clinic       | 831                            | 982        |              | 847         |              | 882                         | 924         |              | 880         |              |
| Provider Staffing, FTE       |                                |            |              |             |              |                             |             |              |             |              |
| Primary Care                 | 6.3 (3.4)                      | 5.8 (2.1)  | 0.70         | 5.1 (2.4)   | 0.43         | 5.0 (2.4)                   | 7.0 (1.3)   | 0.14         | 5.3 (2.1)   | 0.83         |
| Behavioral Health            | 1.7 (1.1)                      | 2.0 (1.1)  | 0.70         | 2.4 (1.9)   | 0.35         | 2.4 (.5)                    | 3.0 (.8)    | 0.06         | 2.1 (2.1)   | 0.48         |
| Payor Mix, %,                |                                |            |              |             |              |                             |             |              |             |              |
| Medicaid                     | 48.7 (10.3)                    | 53.6 (6.6) | 0.37         | 62.0 (13.7) | 0.03         | 54.5 (5.8)                  | 54.0 (10.8) | 0.94         | 55.7 (17.1) | 0.85         |
| Medicare                     | 11.3 (9.3)                     | 11.9 (7.3) | 0.88         | 9.4 (4.5)   | 0.64         | 12.8 (5.8)                  | 9.4 (5.9)   | 0.39         | 10.3 (9.5)  | 0.52         |
| Commercial                   | 25.9 (20.4)                    | 20.0 (5.9) | 0.38         | 15.6 (6.4)  | 0.14         | 18.9 (6.5)                  | 19.9 (6.2)  | 0.89         | 22.9 (21.5) | 0.57         |
| Self-Pay                     | 13.6 (9.4)                     | 14.3 (7.6) | 0.89         | 13.0 (11.8) | 0.91         | 13.8 (3.1)                  | 16.0 (10.3) | 0.65         | 11.1 (12.9) | 0.60         |
| Other                        | 0.4 (0.8)                      | 0.1 (0.4)  | 0.29         | 0.1 (0.4)   | 0.33         | 0.1 (0.4)                   | 0.6 (0.8)   | 0.10         | 0.0 (0)     | 0.63         |
| MeHAF score, mean (SD)       |                                |            |              |             |              |                             |             |              |             |              |
| Overall                      | 81 (11)                        | 95 (9)     | 0.01         | 120 (9)     | <0.01        | 85 (10)                     | 98 (13)     | 0.90         | 114 (20)    | <0.01        |
| Integrated Team Structure    | 29 (7)                         | 38 (1)     | <0.01        | 47 (4)      | <0.01        | 35 (6)                      | 37 (7)      | 0.71         | 42 (12)     | 0.11         |
| Patient & Family Engagement  | 18 (5)                         | 18 (5)     | 0.74         | 26 (3)      | <0.01        | 14 (0)                      | 22 (3)      | <0.01        | 27 (3)      | <0.01        |

Table A3. Characteristics of attributed Medicaid enrollees

|                            | Integrated Team Infrastructure |             |              |             |              | Patient & Family Engagement |             |              |             |              |
|----------------------------|--------------------------------|-------------|--------------|-------------|--------------|-----------------------------|-------------|--------------|-------------|--------------|
|                            | Low                            | Average     | <i>p-val</i> | High        | <i>p-val</i> | Low                         | Average     | <i>p-val</i> | High        | <i>p-val</i> |
|                            | N=2997                         | N=10347     |              | N=4243      |              | N=9244                      | N=3263      |              | N=5080      |              |
| Age, years, mean (SD)      | 42.5 (13.1)                    | 40.7 (13.9) | <0.01        | 40.9 (14.4) | <0.01        | 40.5(13.5)                  | 40.5 (13.9) | 0.98         | 42.3 (14.6) | 0.000        |
| Female, %                  | 51.9%                          | 58.3%       | <0.01        | 58.2%       | <0.01        | 55.9%                       | 61.8%       | <0.01        | 56.6%       | 0.39         |
| Race/Ethnicity, %          |                                |             |              |             |              |                             |             |              |             |              |
| Native American            | 13.5%                          | 0.5%        | <0.01        | 0.4%        | <0.01        | 4.7%                        | 0.6%        | <0.01        | 0.4%        | <0.01        |
| Asian                      | 4.6%                           | 23.1%       | <0.01        | 25.9%       | <0.01        | 10.1%                       | 12.9%       | <0.01        | 44.7%       | <0.01        |
| Black                      | 22.9%                          | 31.2%       | <0.01        | 17.8%       | <0.01        | 32.2%                       | 32.5%       | 0.61         | 12.4%       | <0.01        |
| Hispanic/Latinx            | 12.3%                          | 9.8%        | <0.01        | 14.0%       | 0.01         | 11.4%                       | 14.3%       | <0.01        | 8.9%        | <0.01        |
| Hawaiian/Pacific Islander  | 1.7%                           | 2.5%        | 0.02         | 3.6%        | <0.01        | 2.4%                        | 2.9%        | 0.17         | 2.9%        | 0.09         |
| White                      | 32.3%                          | 24.0%       | <0.01        | 26.7%       | <0.01        | 29.0%                       | 26.5%       | <0.01        | 20.3%       | <0.01        |
| Multiple                   | 8.8%                           | 5.0%        | <0.01        | 5.5%        | <0.01        | 6.4%                        | 5.8%        | 0.29         | 4.7%        | <0.01        |
| Unknown                    | 3.9%                           | 3.9%        | 0.95         | 5.9%        | <0.01        | 3.7%                        | 4.5%        | 0.05         | 5.6%        | <0.01        |
| All POC                    | 16.4%                          | 60.3%       | <0.01        | 23.3%       | <0.01        | 47.0%                       | 17.0%       | <0.01        | 28.5%       | <0.01        |
| Gagne Score                | 0.7 (1.3)                      | 0.4 (1.1)   | <0.01        | 0.4 (1.1)   | <0.01        | 0.5 (1.2)                   | 0.4 (1.1)   | <0.01        | 0.4 (1.1)   | <0.01        |
| Comorbidities, N           | 2.4 (2.6)                      | 1.7 (2.2)   | <0.01        | 1.8 (2.4)   | <0.01        | 1.9 (2.4)                   | 1.9 (2.4)   | 0.89         | 1.6 (2.2)   | <0.01        |
| Mental Health Condition, % | 59.6%                          | 41.2%       | <0.01        | 40.4%       | <0.01        | 48.6%                       | 45.2%       | <0.01        | 35.0%       | <0.01        |
| Substance Use Condition, % | 40.1%                          | 17.2%       | <0.01        | 15.5%       | <0.01        | 25.2%                       | 17.1%       | <0.01        | 14.8%       | <0.01        |
| Healthcare Utilization, N  |                                |             |              |             |              |                             |             |              |             |              |
| Outpatient                 | 7.8 (9.5)                      | 6.3 (6.2)   | <0.01        | 6.3 (6.3)   | <0.01        | 6.8 (7.3)                   | 6.4 (6.6)   | <0.01        | 6.4 (6.3)   | 0.01         |
| ED                         | 1.8 (6.6)                      | .9 (4.7)    | <0.01        | .8 (2.9)    | <0.01        | 1.2 (5.1)                   | 1.1 (4.3)   | 0.18         | .67 (4.3)   | <0.01        |
| Inpatient                  | .10 (.46)                      | .07 (.36)   | <0.01        | .06(.32)    | <0.01        | .08 (.40)                   | .08 (.37)   | 0.62         | .05 (.31)   | <0.01        |

Notes: POC = persons of color

Table A4. Average marginal effects of the domains of behavioral health integration on ED use and inpatient admissions across all attributed patients

|                                                   | Low                | Average            | High               | Difference Low versus Average | Difference Low Versus High |
|---------------------------------------------------|--------------------|--------------------|--------------------|-------------------------------|----------------------------|
| <b>Infrastructure for team-based care</b>         |                    |                    |                    |                               |                            |
| ED Use                                            | 40.4% (29.6, 51.3) | 31.2% (27.6, 34.8) | 33.2% (27.6-38.8)  | -9.2 (-21.0, 2.6)             | -7.2% (-19.2, 4.8)         |
| Inpatient Admission                               | 3.2% (2.5, 3.9)    | 3.4% (2.7, 4.1)    | 3.2% (2.4, 3.9)    | 0.02 (-0.07, 1.1)             | <0.01 (-1.1, 1.0)          |
| <b>Patient &amp; Family Engagement Activities</b> |                    |                    |                    |                               |                            |
| ED Use                                            | 34.3% (29.0, 39.6) | 35.4% (29.2, 41.6) | 30.6% (25.2, 36.0) | 1.1% (-7.0, 9.2)              | -3.7% (-11.4 to 4.0)       |
| Inpatient Admission                               | 3.5% (3.0, 4.1)    | 3.0% (2.5, 3.5)    | 2.9% (2.1, 3.8)    | -0.5% (-1.3, 0.2)             | -0.6% (-1.6, 0.4)          |

Table A5. Average marginal effects of the domains of behavioral health integration on ED use for subset of patients with a behavioral health condition

|                                        | Low                | Average            | High               | Difference Low versus Average | Difference Low Versus High |
|----------------------------------------|--------------------|--------------------|--------------------|-------------------------------|----------------------------|
| Infrastructure for team-based care     | 60.5% (41.0, 79.9) | 46.2% (37.7, 54.7) | 49.3% (36.8, 61.8) | -14.3% (-37.1, 8.5)           | -11.2% (-34.8, 12.4)       |
| Patient & Family Engagement Activities | 50.1% (39.8, 60.5) | 52.2% (40.5, 63.9) | 44.9 (32.6, 57.2)  | 2.1 (-13.9, 18.0)             | -5.3 (-21.9, 11.4)         |

*Note: due to small sample sizes, the hierarchical models for inpatient admissions did not converge in the subgroup analysis. Average marginal effects for team based care were significant until we applied a small cluster correction to our standard errors. Thus, our results are conservative.*
